# Supplementary material
Source: PubMed Central journal article supplement (PMC2705591)
Supplement: 0810145106_0810145106SI.pdf [file 0810145106_0810145106SI.pdf]

# Supporting Information

Deutman et al. 10.1073/pnas.0810145106

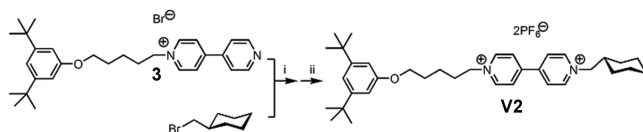

Scheme S1. Synthesis of viologen derivative V2. (i) DMF 95 °C, 3 days; (ii) NH<sub>4</sub>PF<sub>6</sub>(aq).

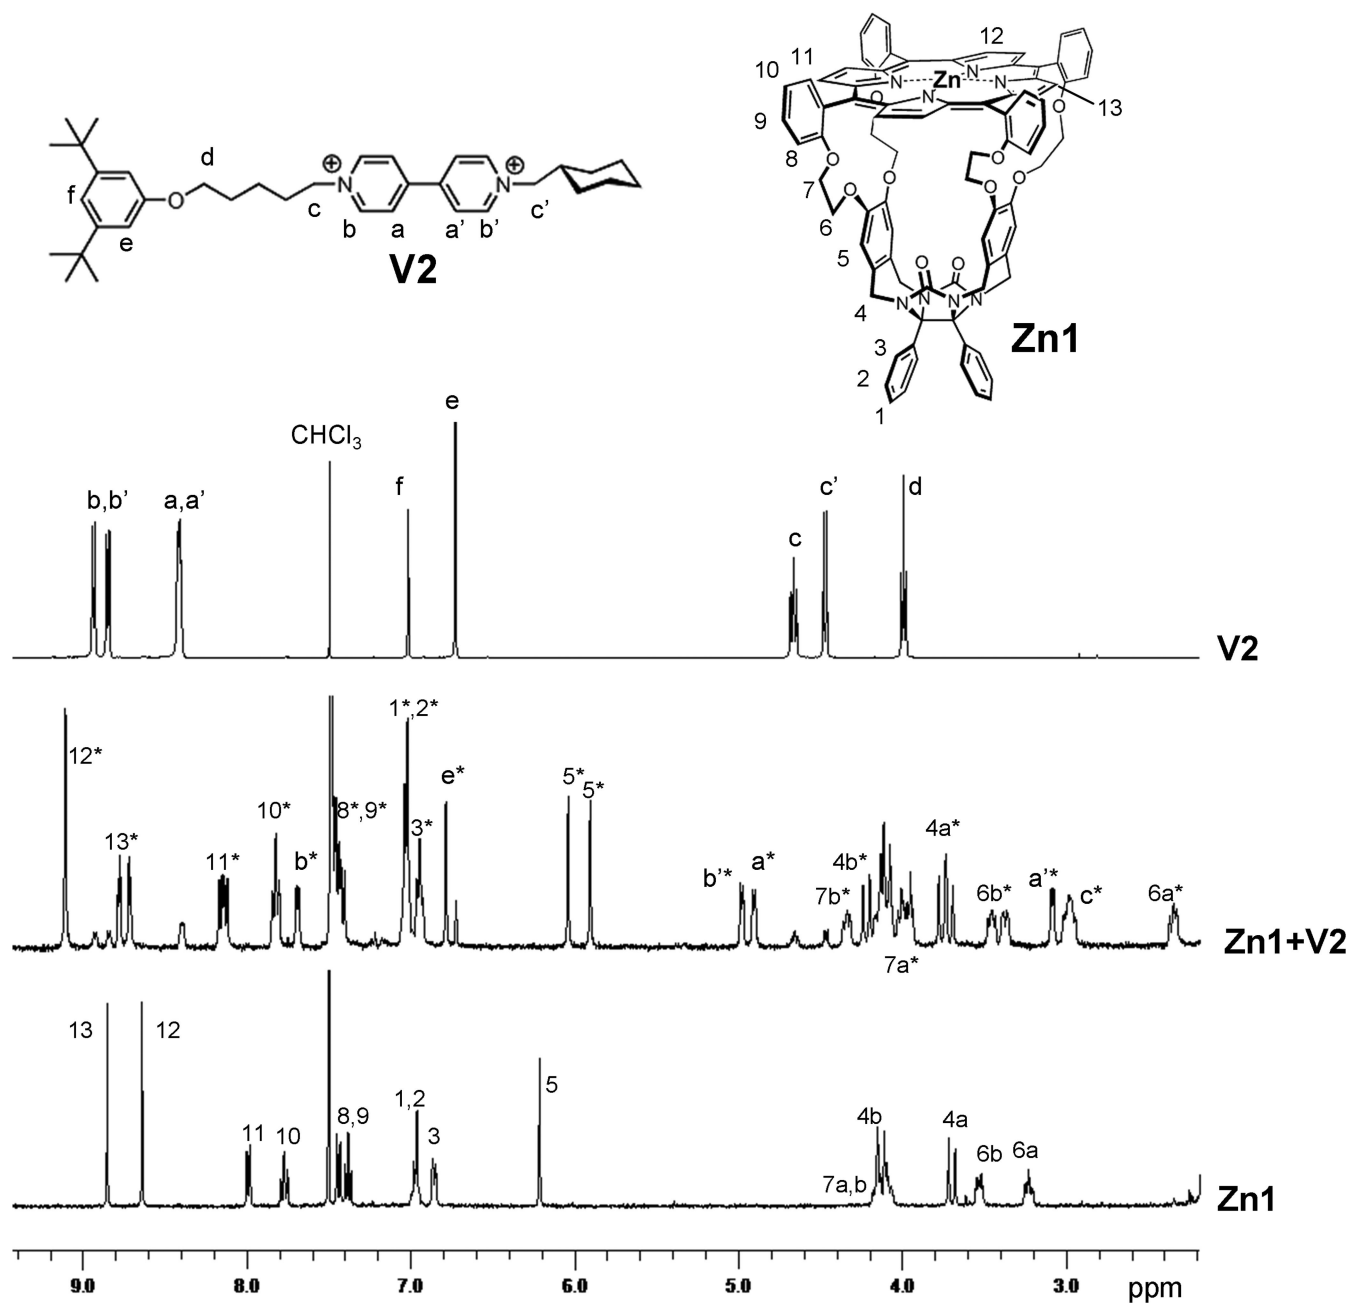

Fig. S1.  $^1\text{H}$  NMR spectra (400 MHz in 1:1 (vol/vol)  $\text{CD}_3\text{CN}/\text{CDCl}_3$  at 298 K) with assignments of **Zn1**, **V2** and a mixture of **Zn1** and 1.2 equivalents of **V2**.

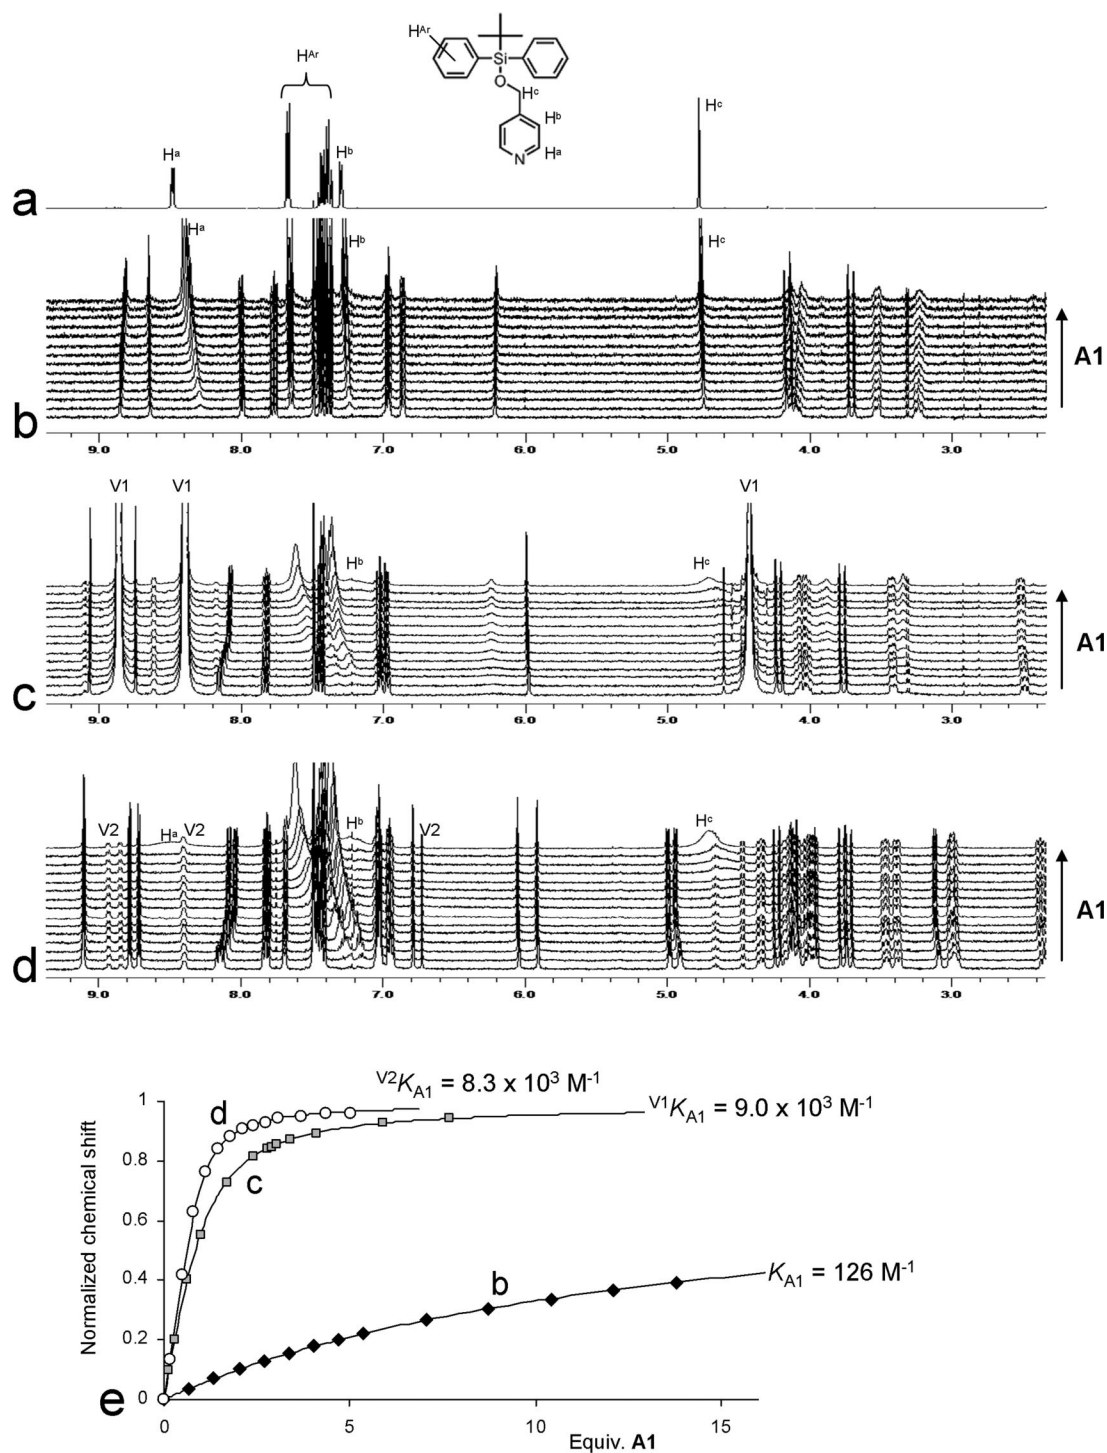

**Fig. S2.**  $^1\text{H}$  NMR (400 MHz in 1:1 (vol/vol)  $\text{CD}_3\text{CN}/\text{CDCl}_3$  at 298 K) binding experiments. (a) Spectrum of A1. (b)  $^1\text{H}$  NMR titration experiment of Zn1 with (from bottom to top increasing concentrations of) A1. (c)  $^1\text{H}$  NMR titration experiment of a mixture of Zn1 and an excess of V1 with (from bottom to top increasing concentrations of) A1. (d)  $^1\text{H}$  NMR titration experiment of the pseudorotaxane complex between Zn1 and V2 with (from bottom to top increasing concentrations of) A1. (e) The obtained normalized binding isotherms from the titration experiments (b, c, and d as above) with the fits according to a 1:1 receptor-guest binding process.

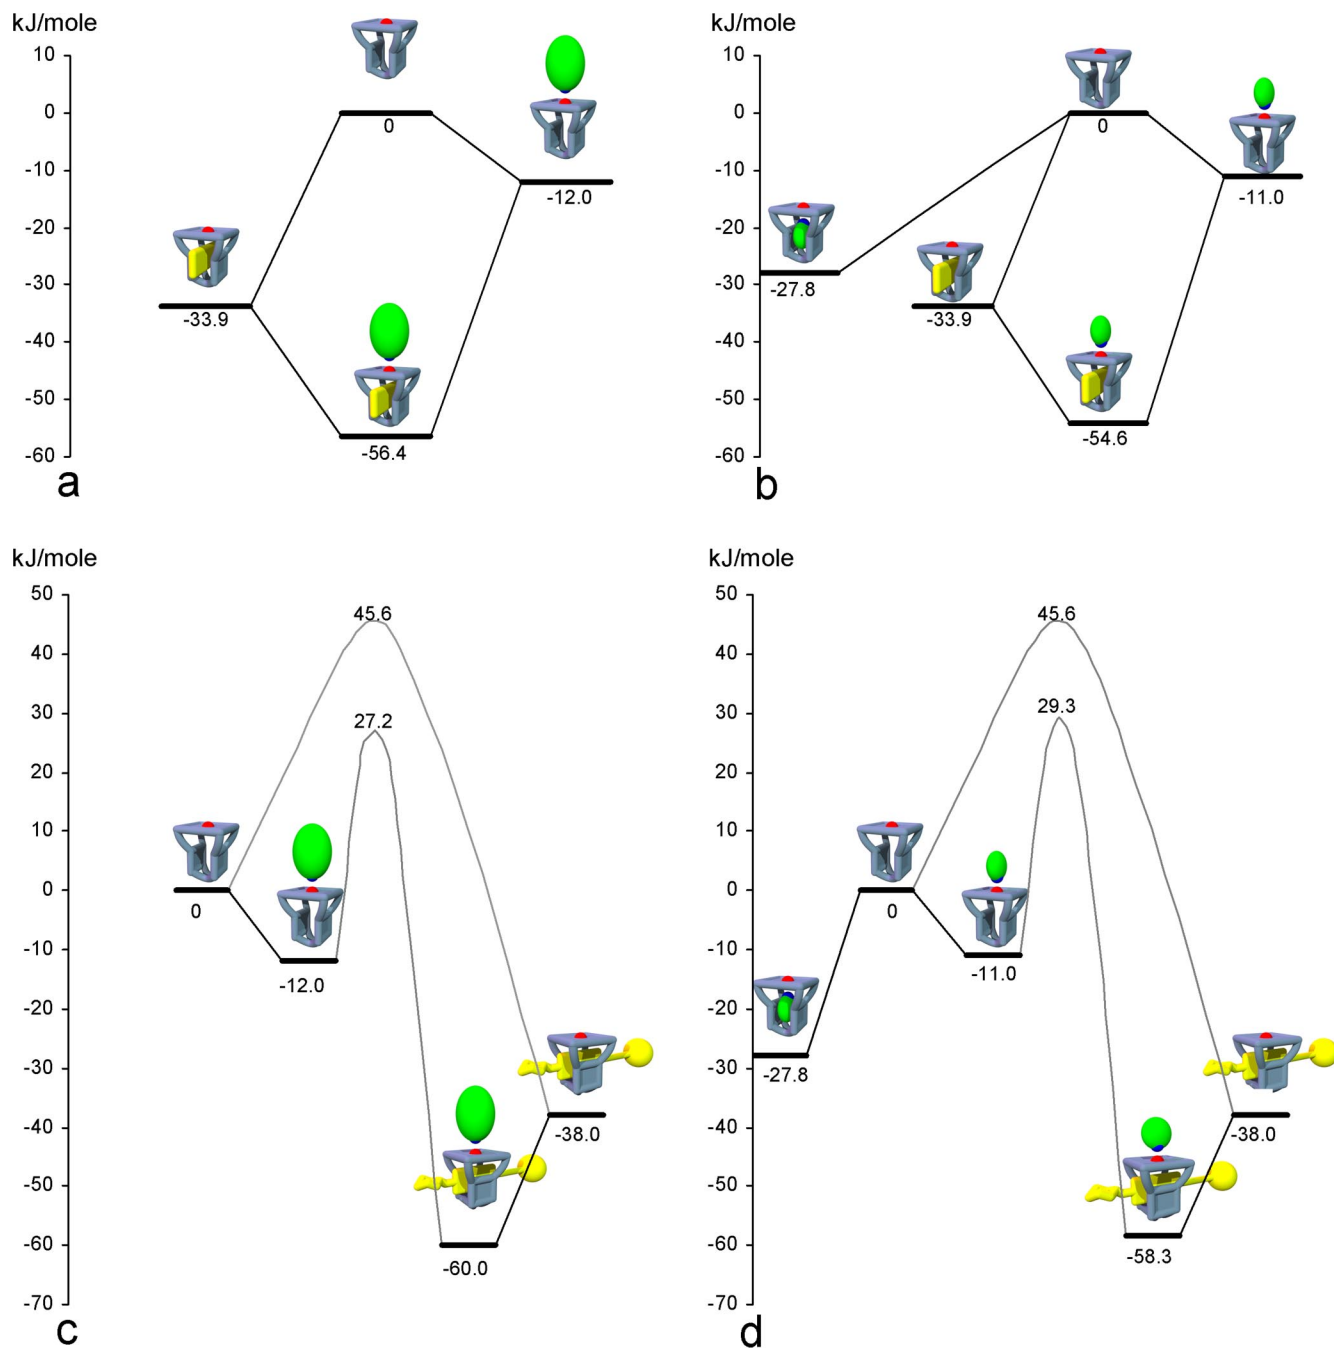

**Fig. S3.** Energy diagrams of the cooperative binding circles with the binding free energies of the 1:1 and ternary complexes, and the activation energies of the slippage process as experimentally derived. (a) The combination Zn1, A1, and V1. (b) The combination Zn1, A2, and V1. (c) The combination Zn1, A1, and V2. (d) The combination Zn1, A2, and V2.

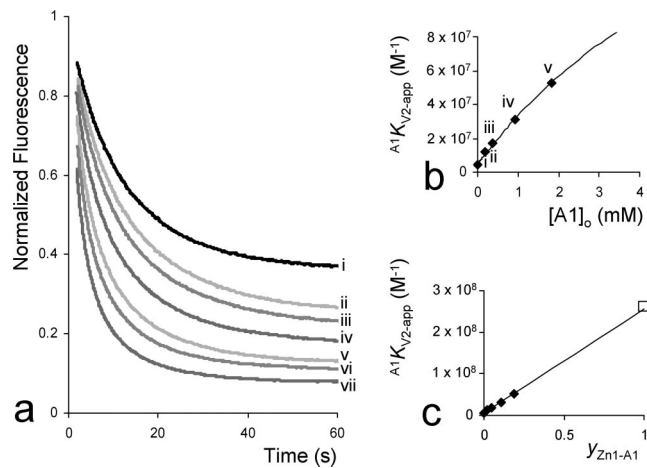

**Fig. S4.** Fluorescence slippage experiments between **V2** and **Zn1** in the presence of **A1**. (a) Fluorescence emission as a function of time upon the addition of 1 equivalent of **V2** to **Zn1** ( $0.8 \mu\text{M}$ ) in the presence of increasing concentrations (from *i* to *vii*) of **A1**. (b) Calculated rate constants  $A^1K_{V2-app}$  plotted vs. the concentration of **A1** and the fit according to Eq. 1. (c) Linear relationship between the value of  $A^1K_{V2-app}$  and the fractional saturation of **Zn1** with **A1** ( $y_{Zn1-A1}$ ) according to Eq. 3.

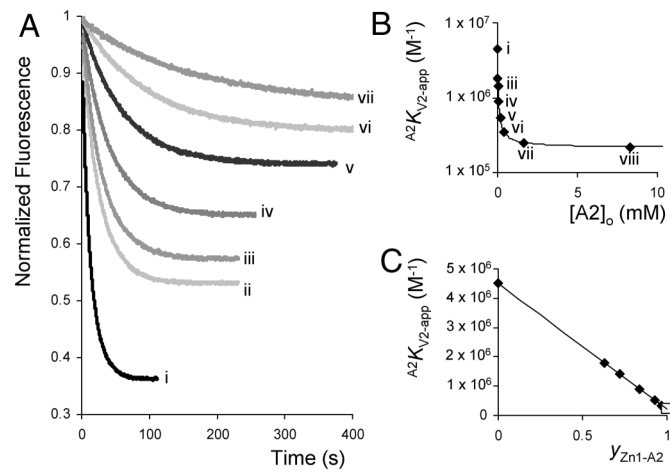

**Fig. S5.** Fluorescence slippage experiments between **V2** and **Zn1** in the presence of increasing concentrations of **A2**. (A) Fluorescence emission as a function of time upon the addition of 1 equivalent of **V2** to **Zn1** ( $\mu M$ ) in the presence of increasing concentrations (from *i* to *vii*) of **A2**. (B) Calculated rate constants  $^{A2}K_{V2-app}$  plotted vs. the concentration of **A2** and the fit according to Eq. 4. (C) Linear relationship of the value of  $^{A2}K_{V2-app}$  and the fractional saturation of **Zn1** with **A2** ( $y_{Zn1-A2}$ ) according to Eq. 5.

Table S1. Measured association constants [ $G^2K_{G1}$  ( $M^{-1}$ )] of titration experiments of guests (G1) to Zn1 in the presence and absence of the other guest (G2) and the measured rate constants of complex formation [ $G^2k_{on}$  ( $M^{-1}s^{-1}$ )] and complex dissociation [ $G^2k_{off}$  ( $s^{-1}$ )] between V2 and Zn1 via slippage in the presence of different concentrations of pyridine ligands A1 and A2

| G1 | G2 ([G2] <sub>o</sub> )     | $G^2K_{G1}^{††}$                       | $G^2k_{on}^{**}$                       | $G^2k_{off}^{††}$                       |
|----|-----------------------------|----------------------------------------|----------------------------------------|-----------------------------------------|
| A1 | –                           | $1.3 \times 10^{2*†}$                  |                                        |                                         |
| A2 | –                           | $7.5 \times 10^{4†}$                   |                                        |                                         |
| A1 | V1 (full)                   | $9.0 \times 10^{3*†}$                  |                                        |                                         |
| A1 | V2 (full)                   | $8.3 \times 10^{3*}$                   |                                        |                                         |
| V1 | –                           | $8.6 \times 10^{5‡}$                   |                                        |                                         |
| V1 | A1 ( $2.1 \times 10^{-4}$ ) | $2.2 \times 10^6 †$                    |                                        |                                         |
| V1 | A1 ( $7.4 \times 10^{-4}$ ) | $5.3 \times 10^{6‡}$                   |                                        |                                         |
| V1 | A1 ( $1.5 \times 10^{-3}$ ) | $9.7 \times 10^{6‡}$                   |                                        |                                         |
| V1 | A1 ( $2.9 \times 10^{-3}$ ) | $1.5 \times 10^{7‡}$                   |                                        |                                         |
| V1 | A1 ( $6.7 \times 10^{-3}$ ) | $2.7 \times 10^{7‡}$                   |                                        |                                         |
| V1 | A1 (full)                   | <b><math>6.5 \times 10^{7§}</math></b> |                                        |                                         |
| V1 | A2 ( $9.0 \times 10^{-6}$ ) | $5.6 \times 10^5 †$                    |                                        |                                         |
| V1 | A2 ( $1.8 \times 10^{-5}$ ) | $4.2 \times 10^{5‡}$                   |                                        |                                         |
| V1 | A2 ( $4.4 \times 10^{-5}$ ) | $2.5 \times 10^{5‡}$                   |                                        |                                         |
| V1 | A2 ( $8.8 \times 10^{-5}$ ) | $1.6 \times 10^{5‡}$                   |                                        |                                         |
| V1 | A2 ( $1.7 \times 10^{-4}$ ) | $1.1 \times 10^{5‡}$                   |                                        |                                         |
| V1 | A2 ( $4.0 \times 10^{-4}$ ) | $8.5 \times 10^{4‡}$                   |                                        |                                         |
| V1 | A2 ( $7.2 \times 10^{-4}$ ) | $7.3 \times 10^{4‡}$                   |                                        |                                         |
| V1 | A2 (full)                   | <b><math>5.8 \times 10^{4§}</math></b> |                                        |                                         |
| V2 | –                           | $4.5 \times 10^{6‡}$                   | $6.4 \times 10^{4‡}$                   |                                         |
| V2 | A1 ( $1.9 \times 10^{-4}$ ) | $1.2 \times 10^{7‡}$                   | $8.6 \times 10^{4‡}$                   |                                         |
| V2 | A1 ( $3.7 \times 10^{-4}$ ) | $1.7 \times 10^{7‡}$                   | $1.0 \times 10^{5‡}$                   |                                         |
| V2 | A1 ( $9.2 \times 10^{-4}$ ) | $3.1 \times 10^{7‡}$                   | $1.5 \times 10^{5‡}$                   |                                         |
| V2 | A1 ( $1.8 \times 10^{-3}$ ) | $5.3 \times 10^{7‡}$                   | $2.1 \times 10^{5‡}$                   |                                         |
| V2 | A1 ( $3.3 \times 10^{-3}$ ) | **                                     | $2.9 \times 10^{5‡}$                   |                                         |
| V2 | A1 ( $6.4 \times 10^{-3}$ ) | **                                     | $4.2 \times 10^{5‡}$                   |                                         |
| V2 | A1 (full)                   | <b><math>2.6 \times 10^{8§}</math></b> | <b><math>8.4 \times 10^{5§}</math></b> |                                         |
| V2 | –                           | $4.5 \times 10^{6‡}$                   |                                        | $1.4 \times 10^{-2‡}$                   |
| V2 | A1 ( $1.9 \times 10^{-4}$ ) | $1.2 \times 10^{7‡}$                   |                                        | $7.3 \times 10^{-3‡}$                   |
| V2 | A1 ( $3.7 \times 10^{-4}$ ) | $1.8 \times 10^{7‡}$                   |                                        | $6.0 \times 10^{-3‡}$                   |
| V2 | A1 ( $9.2 \times 10^{-4}$ ) | $3.2 \times 10^{7‡}$                   |                                        | $4.3 \times 10^{-3‡}$                   |
| V2 | A1 (full)                   | <b><math>2.8 \times 10^{8§}</math></b> |                                        | <b><math>3.1 \times 10^{-3§}</math></b> |
| V2 | A2 ( $2.3 \times 10^{-5}$ ) | $1.8 \times 10^{6‡}$                   | $2.4 \times 10^{4‡}$                   |                                         |
| V2 | A2 ( $3.5 \times 10^{-5}$ ) | $1.4 \times 10^{6‡}$                   | $1.8 \times 10^{4‡}$                   |                                         |
| V2 | A2 ( $6.9 \times 10^{-5}$ ) | $9.0 \times 10^{5‡}$                   | $1.1 \times 10^{4‡}$                   |                                         |
| V2 | A2 ( $1.7 \times 10^{-4}$ ) | $5.3 \times 10^{5‡}$                   | $5.0 \times 10^{3‡}$                   |                                         |
| V2 | A2 ( $4.3 \times 10^{-4}$ ) | $3.5 \times 10^{5‡}$                   | $2.5 \times 10^{3‡}$                   |                                         |
| V2 | A2 ( $1.7 \times 10^{-3}$ ) | $2.5 \times 10^{5‡}$                   | $1.1 \times 10^{3‡}$                   |                                         |
| V2 | A2 ( $8.3 \times 10^{-3}$ ) | $2.2 \times 10^{5‡}$                   | $6.8 \times 10^{2‡}$                   |                                         |
| V2 | A2 (full)                   | <b><math>2.2 \times 10^{5§}</math></b> | <b><math>6.8 \times 10^{2§}</math></b> |                                         |
| V2 | A2 ( $5.6 \times 10^{-5}$ ) | $1.2 \times 10^{6‡}$                   |                                        | $1.0 \times 10^{-2‡}$                   |
| V2 | A2 ( $1.4 \times 10^{-4}$ ) | $7.5 \times 10^{5‡}$                   |                                        | $8.4 \times 10^{-3‡}$                   |
| V2 | A2 ( $3.5 \times 10^{-4}$ ) | $6.1 \times 10^{5‡}$                   |                                        | $6.0 \times 10^{-3‡}$                   |
| V2 | A2 ( $1.4 \times 10^{-3}$ ) | $3.8 \times 10^{5‡}$                   |                                        | $4.1 \times 10^{-3‡}$                   |
| V2 | A2 (full)                   | <b><math>3.6 \times 10^{5§}</math></b> |                                        | <b><math>3.2 \times 10^{-3‡}</math></b> |

The calculated values of the magnitudes of the constants upon full saturation of Zn1 with the second guest present in solution are presented in bold type.

\*Determined by  $^1H$  NMR titrations ( $[Zn1]_o \approx mM$ ) in 1:1 (vol/vol)  $CDCl_3/CD_3CN$  at 298 K.

†Determined by UV-vis titrations ( $[Zn1]_o \approx \mu M$ ) in 1:1 (vol/vol) acetonitrile/chloroform at 298 K.

‡Determined by fluorescence titrations and kinetic experiments ( $[Zn1]_o \approx \mu M$ ) in 1:1 (vol/vol) acetonitrile/chloroform at 298 K.

§The calculated value based on the titration series in which  $y_{Zn1-G2} = 1$ .

\*\*Estimated error <15%.

††Estimated error <35%.

\*\*Values too high to determine accurately at the used experimental concentrations.

## Other Supporting Information Files

[SI Appendix \(PDF\)](#)
